1 **A novel workflow to improve multi-locus genotyping of wildlife species: an**  
2 **experimental set-up with a known model system**

3  
4

5 Gillingham<sup>1</sup>, Mark A.F.; Montero<sup>1,2</sup>, B. Karina; Wilhelm<sup>1</sup>, Kerstin; Grudzus<sup>1</sup>, Kara; Sommer<sup>1</sup>,  
6 Simone; Santos<sup>1</sup>, Pablo S.C.

7  
8

9 <sup>1</sup>*University of Ulm, Institute of Evolutionary Ecology and Conservation Genomics, Albert-Einstein-*  
10 *Allee 11, 89069 Ulm, Germany [mark.gillingham@uni-ulm.de](mailto:mark.gillingham@uni-ulm.de), [kerstin.wilhelm@uni-ulm.de](mailto:kerstin.wilhelm@uni-ulm.de),*  
11 *[karag@gmx.de](mailto:karag@gmx.de), [simone.sommer@uni-ulm.de](mailto:simone.sommer@uni-ulm.de), [pablo.santos@uni-ulm.de](mailto:pablo.santos@uni-ulm.de)*

12 <sup>2</sup>*Zoological Institute, Animal Ecology & Conservation, Biocenter Grindel, Universität Hamburg,*  
13 *Hamburg, Germany [karina.montero@uni-hamburg.de](mailto:karina.montero@uni-hamburg.de)*

14  
15

16 **Keywords: open-source genotyping pipeline, ACACIA, next generation sequencing, amplicon**  
17 **genotyping, allele dropout, PCR amplification bias, sequencing bias, multigene family, MHC**

18

19 **Corresponding authors:**

20 Mark Gillingham and Pablo Santos

21 Evolutionary Ecology and Conservation Genomics

22 Albert-Einstein-Allee 11

23 89069 Ulm

24 Germany

25 Phone: +49 731 50 22692

26 e-mail: [mark.gillingham@uni-ulm.de](mailto:mark.gillingham@uni-ulm.de); [pablo.santos@uni-ulm.de](mailto:pablo.santos@uni-ulm.de)

27 **Abstract**

28 Genotyping novel complex multigene systems is particularly challenging in non-model organisms.  
29 Target primers frequently amplify simultaneously multiple loci leading to high PCR and sequencing  
30 artefacts such as chimeras and allele amplification bias. Most next-generation sequencing  
31 genotyping pipelines have been validated in non-model systems whereby the real genotype is  
32 unknown and the generation of artefacts may be highly repeatable. Further hindering accurate  
33 genotyping, the relationship between artefacts and copy number variation (CNV) within a PCR  
34 remains poorly described. Here we investigate the latter by experimentally combining multiple  
35 known major histocompatibility complex (MHC) haplotypes of a model organism (chicken, *Gallus*  
36 *gallus*, 43 artificial genotypes with 2-13 alleles per amplicon). In addition to well defined “optimal”  
37 primers, we simulated a non-model species situation by designing “naïve” primers, with sequence  
38 data from closely related Galliform species. We applied a novel open-source genotyping pipeline  
39 (ACACIA) to the data, and compared its performance with another, previously published, pipeline.  
40 ACACIA yielded very high allele calling accuracy (>98%). Non-chimeric artefacts increased  
41 linearly with increasing CNV but chimeric artefacts leveled when amplifying more than 4-6 alleles.  
42 As expected, we found heterogeneous amplification efficiency of allelic variants when co-  
43 amplifying multiple loci. Using our validated ACACIA pipeline and the example data of this study,  
44 we discuss in detail the pitfalls researchers should avoid in order to reliably genotype complex  
45 multigene systems. ACACIA and the datasets used in this study are publicly available at GitLab and  
46 FigShare ([https://gitlab.com/psc\\_santos/ACACIA](https://gitlab.com/psc_santos/ACACIA) and  
47 <https://figshare.com/projects/ACACIA/66485>).

## 48 **Introduction**

49 A key challenge for molecular ecologists is that they frequently work on systems with limited to no  
50 knowledge of their genomes. This means that the development of a genotyping approach often  
51 relies on information from closely related species available in genetic databases. Furthermore,  
52 assessing and validating genotyping methods can be particularly challenging when the structure of  
53 the target region is unknown.

54 Multigene complexes, such as resistance genes (R-genes) and self-incompatibility genes (SI-  
55 genes) in plants, immunoglobulin superfamily and major histocompatibility genes (MHC) in  
56 vertebrates, and homeobox genes in animals, plants and fungi, among many others, are particularly  
57 challenging to genotype in non-model organisms. As a result of high sequence similarity from  
58 recent gene duplication events, polymerase chain reaction (PCR) primers will frequently bind  
59 across multiple loci leading to the amplification of multiple allelic variants (Babik, 2010;  
60 Biedrzycka et al., 2017; Burri et al., 2014; Lighten et al., 2014; Lighten, Oosterhout, & Bentzen,  
61 2014; Sebastian et al., 2016; Sommer, Courtiol, & Mazzoni, 2013). Unspecific locus amplification  
62 may lead to several biases during PCR since 1) chimeric sequences (hereafter “chimeras”; which  
63 may arise because of incomplete extension of sequences during a PCR cycle which are  
64 subsequently completed with a different allele template) are likely to become more frequent as more  
65 loci are amplified within an amplicon simply because there will be more gene variants from which  
66 chimeras can be generated (Lenz & Becker, 2008); 2) amplification bias of some gene variants  
67 relative to others may occur because primers preferentially bind to some alleles/loci (hereafter  
68 referred to as “PCR competition”) (Marmesat et al., 2016; Sommer, Courtiol, & Mazzoni, 2013).  
69 Creative solutions in primer design and in PCR conditions, such as using pooled primers instead of  
70 degenerate primers (Marmesat et al., 2016), reducing the number of cycles and modifying  
71 elongation steps of PCRs (Judo, Wedel, & Wilson, 1998; Lenz & Becker, 2008; Smyth et al., 2010),  
72 can significantly reduce amplification bias. However, even after the application of such methods,  
73 PCR biases will nonetheless persist and may lead to genotyping errors because: 1) chimerias may

74 be difficult to distinguish from valid recombinant gene variants (frequent in multigene complexes;  
75 Chen et al., 2007), resulting in either PCR artefacts being falsely validated as a true allelic variants  
76 (type I errors, hereafter referred to as “false positives”) or in true allelic variants being falsely  
77 rejected as an artefact (type II errors, hereafter referred to as “allele dropout”) and 2) poorly  
78 amplified allelic variants may not be sequenced resulting in allele dropout, particularly when the  
79 number of sequences per amplicon (a set of sequences of a target region generated within a PCR) is  
80 low (Biedrzycka et al., 2017; Galan et al., 2010; Lighten et al., 2014; Lighten, Oosterhout, &  
81 Bentzen, 2014; Sommer, Courtiol, & Mazzoni, 2013).

82         The recent rapid dissemination of next generation DNA sequencing (NGS) platforms has  
83 provided molecular ecologists with an exciting opportunity to tackle the parallelised genotyping of  
84 multiple markers in numerous species, since it has allowed the generation of thousands of  
85 sequences (termed “reads”) per amplicon, at a fraction of cost and time needed previously (Babik,  
86 2010; Sommer, Courtiol, & Mazzoni, 2013; Lighten et al., 2014). However, NGS platforms have  
87 their own limitations, the most relevant being the relatively high amount of sequencing errors  
88 generated in a typical sequencing run (Glenn, 2011; Huse et al., 2007; Sommer, Courtiol, &  
89 Mazzoni, 2013; Liu, Keller, & Heckel, 2012; McElroy, Luciani, & Thomas, 2012; Ross et al., 2013).  
90 For instance, Illumina, currently the mainstream technology for NGS amplicon sequencing, report  
91 an error rate (primarily substitutions of base pairs) of  $\leq 0.1\%$  per base for  $\geq 75-85\%$  of bases (see  
92 Glenn (2011) for details), although final error rates are likely to be much higher and can reach up to  
93 6% (McElroy et al., 2012). Indeed, previous genotyping studies in multi-locus-systems ( $>10$ )  
94 reported average amplification and sequencing artefact rates of 1.5% to 2.5% per amplicon  
95 (Promerová et al., 2012; Radwan et al., 2012; Sepil et al., 2012). Therefore, PCR competition when  
96 amplifying multiple loci per amplicon means that sequences from some genuine allelic variants  
97 occur at a similar frequency to PCR artefacts or sequencing errors (Biedrzycka et al., 2017; Galan et  
98 al., 2010; Lighten, Oosterhout, & Bentzen, 2014; Sommer, Courtiol, & Mazzoni, 2013). In this

99 scenario, poorly amplified alleles cannot be easily distinguished from artefacts during allele  
100 validation, leading to further false positives and allele dropout during genotyping.

101         The need to distinguish PCR and sequencing artefacts from valid allelic variants has led to  
102 the development of multiple bioinformatic workflows (i.e. a set of bioinformatic steps during  
103 processing of sequencing data which eventually leads to genotyping, hereafter referred to as a  
104 “genotyping pipeline”). While all genotyping pipelines rely to some degree on the assumption that  
105 artefacts are less frequent than genuine allelic variants, they vary in the approach used to  
106 discriminate poorly amplified allelic variants from artefacts. Genotyping pipelines for complex gene  
107 families have been extensively reviewed in Biedrzycka et al. (2017). Recently developed pipelines  
108 cluster artefacts to their putative parental sequences thereby increasing the read depths of true  
109 variants (Lighten et al., 2014; Pavey et al., 2013; Sebastian et al., 2016; Stutz & Bolnick, 2014).  
110 Currently, the most commonly used pipeline for MHC studies is the AmpliSAS web server pipeline  
111 (Sebastian et al., 2016). After chimera removal, AmpliSAS uses a clustering algorithm to  
112 discriminate between artefacts and allelic variants, which take into account the error rate of a  
113 particular NGS technology and the expected lengths of the amplified sequences. This is achieved in  
114 a stepwise manner, whereby it first clusters the most common variant (according to specified error  
115 rates) and then moves on to the next most common variant, until no variant remains to be clustered.  
116 Microbiome studies, which typically amplify hypervariable regions of the 16S rRNA gene from  
117 very diverse bacterial communities within a single amplicon, have used a similar strategy to  
118 AmpliSAS, whereby potential artefactual variants are clustered to suspected parental sequences  
119 using Shannon entropy (referred to as “Oligotyping”; Eren et al., 2013) or other similar clustering  
120 methods (Amir et al., 2017; Callahan, McMurdie, & Holmes, 2016).

121         Most of the amplicon genotyping pipelines for multigene families available to molecular  
122 ecologists have only been tested on non-model organisms for which the real genotype is unknown  
123 (but see Sebastian et al., 2016). As a consequence, studies have frequently depended on  
124 repeatability of duplicated samples to justify genotyping pipeline reliability (Biedrzycka et al.,

125 2017; Galan et al., 2010; Lighten et al., 2014; Radwan et al., 2012; Sebastian et al., 2016; Sommer,  
126 Courtiol, & Mazzoni, 2013). However for a given set of PCR primers and sequencing technology,  
127 PCR and sequencing bias, and thus in turn the rate of false positives and allele dropout, will be  
128 consistently repeatable (Biedrzycka et al., 2017). For instance, the high rate of Illumina substitution  
129 errors are known to be not random (see references within Sebastian et al., 2016) and therefore  
130 variants which result from substitution errors are highly repeatable between amplicons (Biedrzycka  
131 et al., 2017). Furthermore, while the generation of PCR and sequencing artefacts is well known, the  
132 precise relationship between artefacts and the number of alleles amplified within an amplicon for a  
133 given set of primers and sequencing technology has never been described. Yet, having a clear  
134 indication of this relationship is an important step in predicting what are the optimal pipelines  
135 settings (e.g. predicting error rates) for a given number of loci amplified within an amplicon. The  
136 latter can only be achieved by experimentally manipulating CNV of *a priori* known genotypes  
137 before PCR amplification and NGS sequencing.

138         In this study, we manipulated known combinations of the MHC alleles of a model organism  
139 (the chicken, *Gallus gallus*) as an example of a target multigene region of interest to molecular  
140 ecologists, in order to accurately quantify the effects of PCR and sequencing artefacts on  
141 genotyping pipelines. While we focus on the MHC hereafter, all methods and results are applicable  
142 to any multigene family. Like many multigene complexes, MHC genes are subject to multiple gene  
143 conversion, duplication and deletion (Nei, Gu, & Sitnikova, 1997; Nei & Rooney, 2005; Parham &  
144 Ohta, 1996) and MHC gene copies vary considerably across and even within a species (reviewed in  
145 Kelley, Walter, & Trowsdale, 2005). Therefore, the number of MHC loci present in a non-model  
146 study system often remains unknown. For instance, MHC class IIB CNV was found to be as high as  
147 21 in some passerine species, resulting in up to 42 allelic variants amplified within an amplicon and  
148 strong CNV between individuals (Biedrzycka et al., 2017). In contrast, the chicken MHC B  
149 complex is unusually simple, leading it to be coined as a “minimal essential” system, with only two  
150 MHC class I loci and two MHC class II loci (Kaufman, Jacob, et al., 1999; Kaufman, Milne, et al.,

151 1999; Kaufman, Völk, & Wallny, 1995). The latter is therefore an ideal system to validate MHC  
152 genotyping pipelines for the following reasons: 1.) the structure of the B complex is well known  
153 with well-defined primers in conserved regions; 2.) the well characterised B complex haplotype  
154 lineages can be used so that the expected MHC genotyping results are known prior to sequencing  
155 and genotyping and 3.) CNV within an amplicon can be experimentally engineered by combining  
156 DNA samples from multiple MHC B complex haplotypes.

157 In order to perform the genotyping of known chicken MHC haplotypes and extract data  
158 concerning PCR and sequencing artefacts at each step of the genotyping workflow, we developed  
159 and calibrated our own genotyping pipeline (named ACACIA for Allele CALLing proCedure for  
160 Illumina Amplicon sequencing data). ACACIA is written in Python and it takes advantage of  
161 several previously published software dedicated to genomics (detailed in methods), as well as of the  
162 widely used Biopython library (Cock et al., 2009) to handle genomic data. We experimentally  
163 generated a MHC dataset with a range of CNVs by combining DNA samples from multiple chicken  
164 MHC B complex haplotypes. Since MHC B complex in chickens is well characterised, optimal  
165 primers to amplify the entire exons which code for the antigen binding regions have been developed  
166 within the introns (Goto et al., 2002; Shaw et al., 2007). However in most wildlife species, such  
167 extensive genomic information around the region of interest is unavailable. In order to avoid the  
168 problems associated with overfitting ACACIA to one specific dataset and also in order to replicate  
169 the challenge of designing primers for a non-model species, we additionally designed primers  
170 within the exons coding for antigen-binding regions using sequence data from closely related  
171 Galliform species that were not chickens (hereafter referred to as “naïve primers”). The latter  
172 enabled us to gain insight into the relative amount of artefacts generated by an intentionally sub-  
173 optimal set of primers, for which we expected allele dropout.

174 Specifically, this study aimed to:

- 175 1. validate ACACIA using experimentally manipulated genotypes with different CNV that are  
176 known *a priori*;

177 2. accurately describe the relationship between PCR/sequencing artefacts and CNV by  
178 experimentally varying CNV and primer design in a model system;



179 **Materials and Methods**

180 *Samples and DNA extraction*

181 Chicken blood samples originated from experimental inbred lines kept at the Institute for Animal  
182 Health at Compton UK (lines 7<sub>2</sub>, C, WL and N) and the Basel Institute for Immunology in Basel  
183 Switzerland (lines H.B15 and H.B19+), as detailed in Jacob et al. (2000), Shaw et al. (2007) and  
184 Wallny et al. (2006). These lines carry seven common B haplotypes: B2 (line 7<sub>2</sub>), B4 and B12 (line  
185 C), B14 (line WL, sometimes referred as W), B15 (H.B15), B19 (H.B19) and B21 (line N). All the  
186 lines are homozygotes at the MHC except line C, which was not used in this study. In each  
187 haplotype are two class II B loci: BLB1 (previously known as BLBI or BLBminor) and BLB2  
188 (BLBII or BLBmajor), with alleles now designated as BLB1\*02 and BLB2\*02 from the B2  
189 haplotype, etc. All alleles have different nucleotide sequences, except BLB1\*12 and BLB1\*19.  
190 DNA was isolated from blood cells by a salting out procedure (Miller, Dykes, & Polesky, 1988).

191

192 *Generating 41 artificial MHC genotypes*

193 We artificially generated 43 genotypes of varying CNV by combining equimolar amounts of DNA  
194 samples from the seven MHC haplotypes mentioned above (Table 1; created genotypes listed in  
195 Supplementary Table 1).

196

197 *Optimal primers for chicken MHC Class II*

198 We targeted the entire 241 bp of exon 2 of MHC class II, the polymorphic region known to code for  
199 antigen binding sites, using the primers OL284BL (5'-GTGCCCCGCAGCGTTCTTC-3') and  
200 RV280BL (5'-TCCTCTGCACCGTGAAGG-3'; Goto et al., 2002). The primers are not locus  
201 specific and bind to both loci of the chicken B complex.

202

203 *Naïve primer design for chicken MHC Class II*

204 In order to naïvely design primers, we downloaded 61 exon 2 MHC Class II sequences from seven  
205 Galliform species (*Coturnix japonica*, *Crossoptilon crossoptilon*, *Meleagris gallopavo*, *Numida*

206 *meleagris*, *Pavo cristatus*, *Perdix perdix* and *Phasianus colchicus*) from the GenBank  
207 (<https://www.ncbi.nlm.nih.gov/genbank/>). We then used Primer3 (Rozen & Skaletsky, 1999;  
208 Untergasser et al., 2012) to design the forward primer GagaF1 (5'-WTCTACAACCGGCAGCAGT-  
209 3') and the reverse primer GagaR2 (5'- TCCTCTGCACCGTGAWGGAC-3') aiming at amplifying  
210 151 bp of exon 2.

211

### 212 *PCR Amplification, Library Preparation, and High-Throughput Sequencing*

213 For all datasets we replicated all individuals in order to estimate repeatability ( $n_{individuals} = 43$  and  
214  $n_{amplicons} = 86$ ).

215 Individual PCR reactions were tagged with a 10-base pair identifier, using a standardised  
216 Fluidigm protocol (Access Array™ System for Illumina Sequencing Systems, ©Fluidigm  
217 Corporation). We first performed a target specific PCR with the CS1 adapter and the CS2 adapter  
218 appended. To enrich base pair diversity of our libraries during sequencing, we added four random  
219 bases to our forward primer. The CS1 and CS2 adapters were then used in a second PCR to add a  
220 10bp barcode sequence and the adapter sequences used by the Illumina instrument during  
221 sequencing.

222 The first PCR consisted of 3–5 ng of extracted DNA, 0.5 units FastStart Taq DNA  
223 Polymerase (Roche Applied Science, Mannheim, Germany), 1x PCR buffer, 4.5 mM MgCl<sub>2</sub>, 250  
224 μM each dNTP, 0.5 μM primers, and 5% dimethylsulfoxide (DMSO). The PCR was carried out  
225 with an initial denaturation step at 95°C for 4 min followed by 30 cycles at 95°C for 30 s, 60°C for  
226 30 s, 72°C for 45 s, and a final extension step at 72°C for 10 min. The second PCR contained 2 μl  
227 of the product generated by the initial PCR, 80 nM per barcode primer, 0.5 units FastStart Taq DNA  
228 Polymerase, 1x PCR buffer, 4.5 mM MgCl<sub>2</sub>, 250 μM each dNTP, and 5% dimethylsulfoxide  
229 (DMSO) in a final volume of 20 μl. Cycling conditions were the same as those outlined above but  
230 the number of cycles was reduced to ten.

231

232 PCR products were purified using an Agilent AMPure XP (Beckman Coulter) bead cleanup  
233 kit. The fragment size and DNA concentration of the cleaned PCR products were estimated with the  
234 QIAxcel Advanced System (Qiagen) and by UV/VIS spectroscopy on an Xpose instrument  
235 (Trinean, Gentbrugge, Belgium). Samples were then pooled to equimolar amounts of DNA. The  
236 library was prepared as recommended by Illumina (Miseq System Denature and Dilute Libraries  
237 Guide 15039740 v05) and was loaded at 7.5 pM on a MiSeq flow cell with a 10% PhiX spike.  
238 Paired-end sequencing was performed over  $2 \times 251$  cycles.

239

#### 240 *Data analysis with the ACACIA pipeline*

241 ACACIA consists of 11 consecutive steps of data processing.. The software requires two non-  
242 standard python libraries (Pandas (McKinney, 2010) and Biopython (Cock et al., 2009)) as well as  
243 six third-party software (FastQC ([www.bioinformatics.babraham.ac.uk/projects/fastqc/](http://www.bioinformatics.babraham.ac.uk/projects/fastqc/)), FLASH  
244 (Magoč & Salzberg, 2011), VSEARCH (Rognes, Flouri, Nichols, Quince, & Mahé, 2016), BLAST  
245 (Altschul, Gish, Miller, Myers, & Lipman, 1990), MAFFT (Katoh & Standley, 2013) and  
246 Oligotyping (Eren et al., 2013), which can all be installed with one command. The input files are  
247 any number of FASTq files, which are the current canonical output of the Illumina platform. The  
248 step-by-step workflow is described below:

- 249 1. **Generating Quality Reports.** Sequencing quality is assessed for each FASTq file yielded by  
250 the sequencing platform, with the FastQC tool. Reports for each file are produced in HTML  
251 format for visual inspection.
- 252 2. **Trimming low quality ends of forward and reverse reads (optional).** The information  
253 generated in step #1 is crucial for an informed decision about how many (if any) bases should  
254 be trimmed out of each read. If trimming is performed here, step #1 is repeated. Shorter FASTq  
255 files are generated as output of this step.
- 256 3. **Merging paired-end reads (optional).** This concerns projects with paired-end sequencing only  
257 and should be skipped if using data from single-end sequencing (note: the names of the paired

258 forward and reverse FASTq files should be identical prior to the first “\_” character, e.g.: ID1-  
259 S1-L001\_R1\_001.fastq and ID1-S1-L001\_R2\_001.fastq). The reads of file pairs are merged  
260 using FLASH (Magoč & Salzberg, 2011). The minimum and maximum lengths of overlap  
261 during merging can be adjusted by the user to improve performance (defaults are zero and read  
262 length, respectively). New FASTq files with merged sequences are generated as output, as well  
263 as a series of .log files which allow users to monitor merging performance.

264 4. **Trimming primers.** After prompting users to enter the sequences of the primers used for target  
265 amplification, ACACIA trims primer sequences from both ends of the merged sequences  
266 (IUPAC nucleotide ambiguity codes are allowed). Primerless sequences are written into FASTq  
267 files which are the output of this step. The Python functions for trimming primers and low-  
268 quality ends (step #2) are part of the core ACACIA pipeline. External tools were avoided here  
269 to decrease dependency on further software.

270 5. **Quality-control.** Users are then prompted to enter the values of two parameters ( $q$  and  $p$ ) in  
271 order to filter sequences based on their mean phred-scores. First,  $q$  stands for *quality* and  
272 denotes a phred-score threshold that can take values from 0 to 40. Second,  $p$  stands for  
273 *percentage* and denotes the proportion of bases, in any given sequence, that have to achieve at  
274 least the quality threshold  $q$  for that sequence to pass the quality filter. ACACIA uses the default  
275 values  $q = 30$  and  $p = 90$  if users do not explicitly change them. In practical terms, these  
276 thresholds correspond to an error probability lower than  $10^{-3}$  in at least 90% of bases for each  
277 sequence. All information on quality data of sequences passing this filter is then removed and  
278 FASTA files with high-quality sequences are given as the output of this step.

279 6. **Removing singletons.** A large proportion of sequences contain random errors inherent to the  
280 sequencing technology (Quail et al., 2012). In order to decrease file sizes without risking loss of  
281 relevant allele information, ACACIA removes all singletons (sequences that appear one single  
282 time) in an individual amplicon.

283 7. **Removing chimeras.** The chimera identification tool VSEARCH (Rognes et al., 2016) is  
284 employed here, with slightly altered settings (*alignwidth* = 0 and *mindiffs* = 1) aiming at  
285 increasing sensitivity to chimeras that diverge very little from one of the “parent” sequences.  
286 FASTA files with non-chimeric sequences, along with log files for each individual amplicon,  
287 are given as output.

288 8. **Removing unrelated sequences.** All remaining sequences are then compared with a set of  
289 reference sequences chosen by users. This step aims at removing sequences that passed all  
290 filters so far but are products of unspecific priming during PCR. Typically, sequences  
291 phylogenetically related to those being analyzed can be downloaded from the GenBank  
292 ([www.ncbi.nlm.nih.gov/genbank/](http://www.ncbi.nlm.nih.gov/genbank/)). Users are prompted to provide one FASTA file with  
293 reference sequences, which is converted by ACACIA to a local BLAST database (Altschul et  
294 al., 1990) and used for BLAST. Only sequences yielding high-scoring hits to the local database  
295 (expectation value threshold = 10) are written into new FASTA files as an output of this step,  
296 which is the workflow’s last filtering procedure.

297 9. **Aligning.** The MAFFT aligner (Katoh & Standley, 2013) is used to perform global alignments  
298 of sequences that have passed filters. Since all sequences are pooled into one single alignment  
299 output file, the individual IDs are now transferred from file names into the FASTA sequence  
300 headers. We have successfully aligned up to 603,513 sequences in a desktop computer with four  
301 CPUs and 32GB of RAM. Users with a significantly higher number of sequences might find it  
302 useful to increase the computational parallelization of the aligner as described recently  
303 (Nakamura et al., 2018).

304 10. **Calling candidate alleles.** The Oligotyping tool (Eren et al., 2013) is used to call candidate  
305 alleles. Although originally conceived as a tool for identifying variants from microbiome 16S  
306 rRNA amplicon sequencing projects, we recognised Oligotyping as ideal for other forms of  
307 highly variable amplicon sequencing projects. This step consists of concatenating high-  
308 information nucleotide positions (defined by entropy analysis of the alignment produced in the

309 previous step) and subsequently using entropy information to cluster divergent variants, while  
310 grouping redundant information and filtering out artefacts. Although Oligotyping was conceived  
311 as a supervised tool, we automated the selection of parameter values aiming at high tolerance.  
312 This has the advantage of running an unsupervised instance of Oligotype as a pipeline step, at  
313 the cost of keeping potential false positives among the results. Report files with a list of  
314 candidate alleles grouped by individual amplicons are the output of this step.

315 **11. Allele calling and final reporting.** A Python script is used to perform the final allele calling by  
316 filtering out Oligotyping results according to the following criteria:

- 317 ○ Removal of unique allele variants (Y/N). Setting Y (yes) removes all alleles identified in  
318 one single individual amplicon;
- 319 ○ Absolute number of reads (*abs\_nor*): minimum number of sequences that need to support an  
320 allele, otherwise the allele is considered an artefact. Ranges between 0 and 1000, with  
321 default = 10;
- 322 ○ Lowest proportion of reads (*low\_por*): in order to be called in an individual amplicon, an  
323 allele needs to be supported by at least the proportion of reads, within that individual  
324 amplicon, that is declared here. Ranges between 0 and 1, with default = 0, while a value  
325 greater than 0 is recommended for data sets with ultra deep sequencing depth, which can  
326 suffer more from false positives (Biedrzycka et al., 2017).

327

328 Subsequently, putative alleles with very low frequency (both at the individual and population  
329 level) are scrutinised again. If the proportion of reads of a putative allele within an individual  
330 amplicon is less than 10 times lower than the next higher ranking allele, and if it is very similar  
331 (one single different base) to another, more frequent allele present in the same individual  
332 amplicon, that putative allele is considered an artefact and removed. Finally, if an individual  
333 amplicon has fewer than 50 sequences following all of the allele calling validation steps, it is

334 eliminated. Users are able to change all parameter values, but ACACIA recommends settings  
335 based on our benchmarking. The output of this step consists of four files:

- 336 ○ allelereport.csv: a brief allele report listing genotypes of all individual amplicons as well as  
337 frequencies and abundances of all alleles found in the run;
- 338 ○ allelereport\_XL.csv: a detailed allele report including the number of reads supporting each  
339 allele both within individuals and in the population;
- 340 ○ pipelinereport.csv: a pipeline report quantifying read counts and sequences failing or passing  
341 each pipeline step described above;
- 342 ○ alleles.fasta: a FASTA sequence file of all alleles identified in the run.

343

344 We investigated the best *abs\_nor* and *low\_por* for our datasets by first looking at the allele calling  
345 accuracy (the proportion of alleles that have been correctly called) and repeatability (the proportion  
346 of alleles, including false positives, called in both PCR replicates) at varying *abs\_nor* values (range:  
347 0-40, with *low\_por* set at 0) first, and at varying *low\_por* values (range: 0-0.02, with the optimal  
348 *abs\_nor*, in our case 10) second. The latter is how we recommend users to find their optimal  
349 settings, although the range of *abs\_nor* and *low\_por* values to be investigated may vary across  
350 different datasets, depending on where the “peak” optimal setting lies.

351

352 The pipeline is supervised by a configuration text file (config.ini) which is appended every  
353 time users enter one of the settings mentioned below. Users can avoid running ACACIA  
354 interactively (and run the whole workflow in a “hands-free” mode) by providing a complete  
355 config.ini file at the beginning of the workflow. A template of a config.ini file is given in  
356 ACACIA’s repository ([https://gitlab.com/psc\\_santos/ACACIA/blob/master/config.ini](https://gitlab.com/psc_santos/ACACIA/blob/master/config.ini)).

357

358 *Data analysis with the AmpliSAS pipeline*

359 To compare how ACACIA performed relative to an existing relevant pipeline, we applied the web  
360 server AmpliSAS pipeline to our chicken datasets (Sebastian et al., 2016). The default AmpliSAS  
361 parameters of a substitution error rate of 1% and an indel error rate of 0.001% for Illumina data was  
362 used. We then tested for the optimal ‘minimum dominant frequency’ clustering threshold for a  
363 given filtering threshold (i.e. 0.5% for the ‘minimum amplicon frequency’), by testing a set of  
364 thresholds of 10%, 15%, 20% and 25%. All clustering parameters tested gave an allele calling  
365 accuracy of ~97%, but we chose the 25% clustering threshold because it was the only parameter  
366 which resulted in no false positives.

367 Subsequently, AmpliSAS filters for clusters that are likely to be artefacts, including  
368 chimeras and other low frequency artefacts that have filtered through the clustering step (Sebastian  
369 et al., 2016). The default setting for the filtering of low frequency variants (i.e. ‘minimum amplicon  
370 frequency’) is 3%. However this value was far too high for our datasets, and we tested a range of  
371 filtering threshold between 0% and 1% at 0.1% intervals (i.e. 0%, 0.1%, 0.2% etc.). We assessed  
372 the optimal filtering threshold using both allele calling accuracy and repeatability.



373 **Results**

374 *Sequencing depth for each dataset and proportion of artefacts detected using ACACIA*

375 A total of 530,101 paired-end reads were generated for the optimal primers dataset, which  
376 amounted to an average of 6,164 reads per amplicon ( $n = 86$ ). For the naïve primers dataset,  
377 994,338 paired-end reads were generated, amounting to an average of 11,562 reads per amplicon ( $n$   
378  $= 86$ ). The proportion of artefacts identified at each step of the ACACIA pipeline for the chicken  
379 datasets combined is illustrated in Figure 1. Workflow filtering removed the highest proportion of  
380 reads when filtering for singletons (13.6%) and chimeras (14.2%). After all filters, 66.4% of the  
381 original raw reads were used for allele calling.

382

383 *Optimal settings of different workflows*

384 We compared allele calling repeatability optimal *abs\_nor* and *low\_por* settings when using the  
385 ACACIA workflow. We first fixed the *abs\_nor* setting at 10 and tested different *low\_por* values  
386 and found that the optimal setting was 0 across both datasets (Figure 2a.). Lower *low\_por* values  
387 increased allele dropout. We then tested the optimal *abs\_nor* setting for a fixed *low\_por* value of 0  
388 and found that the optimal setting was 10 across both datasets (Figure 2b.). An *abs\_nor* value of 0  
389 increased the rate of false positives and whilst a value above 10 increased the rate of allele dropout.

390 For the AmpliSAS workflow, we investigated the optimal filtering threshold and found  
391 differing optimal values between datasets. For the optimal primer dataset we found that the optimal  
392 filtering threshold was 0.3 whilst 0.5 was found to be optimal for the naïve dataset (Figure 2c.).

393

394 *AmpliSAS vs ACACIA: optimal primers dataset*

395 When using the optimal settings of the ACACIA workflow, comparison of results with expected  
396 genotypes revealed that nine alleles dropped out, no false positives were found (Table 2) and allele  
397 calling accuracy was 98.5% (Figure 2a. and b.). All instances of allele dropout derived from the  
398 B21 haplotype. For two genotypes, both BLB2\*21 and BLB1\*21 dropped out. For four genotypes,

399 only BLB1\*21 dropped out and for one genotype only BLB2\*21 dropped out (Table 2). Allele  
400 calling repeatability was 97.7%.

401 Using the optimal settings in AmpliSAS, 17 alleles dropped out, one false positive was  
402 found (Table 2) and allele calling accuracy was 97% (Figure 2c.). As with ACACIA, most allele  
403 dropouts (16 of 17) derived from the B21 haplotype. For three genotypes, both BLB2\*21 and  
404 BLB1\*21 dropped out. For nine genotypes, only BLB2\*21 alleles dropped out and for one  
405 genotype only BLB1\*21 allele dropped out. Finally for one genotype the allele dropout was  
406 BLB2\*04 and the same genotype had a false positive allele (Table 2). Allele calling repeatability  
407 was 95.3%.

408

#### 409 *AmpliSAS vs ACACIA: chicken naïve primers dataset*

410 Using the optimal settings of ACACIA, we found 134 allele dropouts and allele calling accuracy  
411 was 77.8% (Figure 2a. and b.). However, all dropouts were from the alleles BLB2\*04, BLB2\*15 or  
412 BLB2\*21, for which a primer mismatch was present. Therefore, all allele dropouts could be  
413 explained by primer design and allele calling repeatability between both replicates was 100%.

414 Using the optimal settings of AmpliSAS, we found 152 allele dropouts and allele calling  
415 accuracy was 75.2% (Figure 2c.). As above, 134 dropouts were due to a mismatch with the forward  
416 primer. The remaining 17 alleles that dropped out were BLB2\*12 or \*19 (13 alleles) and BLB1\*14  
417 (4 alleles). Allele calling repeatability between both replicates was 96.1%.

418

#### 419 *Relationship between number of alleles amplified and artefacts*

420 The proportion of sequences classified as artefacts was much higher for PCRs using the optimal  
421 primer set than when using the naïve primer set (Figure 3a. and 3b.). For all chicken data sets, when  
422 considering non-chimeric artefacts, there was a positive relationship between the proportion of  
423 artefacts and the number of alleles amplified (Figure 3a.). There is a logarithmic relationship  
424 between the proportion of chimeric artefacts and the number of alleles amplified whereby the

425 proportion of chimeric reads no longer increased with number of alleles amplified when amplifying  
426 more than 4-6 alleles (Figure 3b.). The total number of unique chimeric reads also tended to follow  
427 a logarithmic relationship, whereby the number of unique chimeric variants seemed to no longer  
428 increase with the number of alleles amplified when amplifying more than 10 alleles (Figure 3c.).  
429 The total number of parental variants generating chimeras also did not increase with CNV when  
430 amplifying more than six alleles (Figure 4). Finally, the contribution of allelic variants to the  
431 proportion of reads decreased sharply with increasing number of alleles when amplifying less than  
432 4-6 alleles (Figure 4). However the contribution of allele variants to the proportion of reads  
433 stabilised when amplifying more than 4-6 alleles (Figure 4). Both alleles from the B21 haplotype in  
434 the optimal dataset and the BLB1\*04 allele in the naïve dataset consistently amplified poorly when  
435 co-amplifying with alleles from other haplotypes (Figure 4).

## 436 **Discussion**

437 Using known MHC genotypes for two datasets (chicken MHC Class II B complex), we achieved  
438 high allele calling accuracy ( $\geq 98.5\%$ ) and repeatability ( $\geq 97.7\%$ ) using ACACIA. With fewer allele  
439 dropouts and false positives, the ACACIA pipeline performed better than AmpliSAS. We  
440 demonstrated the “costs” of designing primers within MHC exon 2 in terms of allele dropout, with  
441 three common alleles failing to amplify when using primers naïvely designed from sequences of  
442 related Galliform species. We also explored the relationship between artefacts and CNV, and found  
443 that surprisingly, the relationship between the proportion of chimeric artefacts and CNV was not  
444 linear but rather leveled when amplifying more than 4-6 alleles. However, non-chimeric artefacts  
445 did increase linearly with increasing CNV. As expected we found heterogeneous amplification  
446 efficiency of allelic variants when amplifying multiple loci within a PCR. Below we discuss in  
447 further detail the ACACIA, AmpliSAS and other genotyping pipelines, primer design for non-  
448 model organisms, the relationship between CNV and artefacts, the effect of chimera formation on  
449 genotyping pipelines and, finally, we conclude by advising users on important points to consider  
450 when genotyping complex multigene systems in non-model organisms.

451

### 452 *AmpliSAS vs ACACIA*

453 Experimentally generating CNV of known chicken MHC class II genotypes allowed us to validate  
454 our ACACIA pipeline to genotype systems with high CNV complexity at high accuracy and  
455 repeatability across replicates. While we achieved higher allele calling accuracy and repeatability  
456 using ACACIA than the AmpliSAS web server pipeline, we do not claim that ACACIA will  
457 necessarily perform better than AmpliSAS with all datasets. To demonstrate the latter we would  
458 need to test both pipelines on a larger number of datasets and/or on simulated datasets. In addition,  
459 while our pipeline should suit data generated with any next-generation sequencing technologies, we  
460 have only tested ACACIA with paired-end Illumina sequencing technology.

461           The most apparent benefit of using the AmpliSAS web server is that it is relatively easy to  
462 use for users with limited knowledge of scripting languages (such as PYTHON, PERL, C++ or R).  
463 However, we have noticed that a number of studies report using default settings when applying the  
464 AmpliSAS pipeline to their dataset. We find this concerning since, as our study demonstrates, the  
465 default clustering and filtering parameters are unlikely to be optimal for most datasets. Indeed,  
466 allele calling accuracy was much lower when using the default settings (81.8%) as compared to the  
467 optimal settings (97%) in the optimal primer dataset in our study, due to high allele dropout when  
468 using the default settings. We therefore strongly discourage users from using default settings and  
469 advise to permute between different filtering and clustering parameters in order to find the best  
470 settings when using the AmpliSAS pipeline.

471           An important disadvantage of the AmpliSAS web server is that at the time of writing,  
472 sequencing depth per amplicon was limited to 5,000 reads. The latter is particularly problematic  
473 when wishing to genotype systems with complex CNV, which require high sequencing depth to  
474 genotype with high repeatability (Biedrzycka et al., 2017). For datasets with sequencing depth  
475 above 5000 reads, AmpliSAS can be run locally but we found that, unlike the web server, the local  
476 version of AmpliSAS had limited documentation and troubleshooting was time consuming.

477           Once installed, ACACIA does not require users to have experience with scripting languages,  
478 allows genotyping with virtually unlimited sequencing depth and provides output data reporting the  
479 number of reads kept at each step of the pipeline. The latter should aid users when deciding upon  
480 optimal parameters and thresholds. As for the AmpliSAS pipeline, we advise to not use default  
481 parameters of ACACIA without critically assessing different parameters for each dataset. In  
482 particular, we urge users to permute between different settings of *abs\_nor* and *low\_por*  
483 parameters. We advise to first search for the optimal *abs\_nor* setting with a fixed *low\_por*  
484 parameter of 0 because it is likely that it is only necessary to change the *low\_por* parameter setting  
485 from 0 in datasets with ultra deep sequencing depth. If it is subsequently found that the optimal  
486 *low\_por* setting is greater than 0, users should repeat the permuting step of *abs\_nor* until the

487 optimal settings are found. Of course finding optimal settings requires the inclusion of replicates for  
488 at least a subset of the dataset. We therefore recommend that a sufficient number of replicates are  
489 always included in genotyping runs to obtain sufficiently accurate repeatability values.

490

#### 491 *Comparing ACACIA to other pipelines*

492 Prior to the development of AmpliSAS and ACACIA, researchers who wished to genotype complex  
493 multigene systems generally relied on either earlier software such as SESAME (Megl  cz et al.,  
494 2011) or jMHC (Stuglik, Radwan, & Babik, 2011) or their own customised scripts (e.g. Kloch *et*  
495 *al.*, 2010; Zagalska-Neubauer *et al.*, 2010). However while both SESAME and jMHC aided allele  
496 calling workflows by allowing users to demultiplex sequences and to generate tables which contains  
497 sequence variants and the number of reads, they do not allow users to apply an automated workflow  
498 to distinguish artefacts from real allelic variants.

499 Genotyping pipelines have evolved and matured in the last decade, however all genotyping  
500 pipelines rely to some degree on the assumption that artefacts are in general less frequent than  
501 genuine allelic variants. However genotyping pipelines vary in the methods used to discriminate  
502 poorly amplified allelic variants from artefacts. An early pipeline suggested by Radwan et al.  
503 (2012), which expanded from initial pipelines suggested by Kloch et al. (2010) and Zagalska-  
504 Neubauer et al. (2010), set a threshold below which all variants are considered artefacts (e.g. <1.5%  
505 per amplicon in Radwan et al. 2012). This threshold is set by comparing rare variants to more  
506 common variants within an amplicon to determine whether the rare variant can be explained as an  
507 artefact (i.e. 1 to 2 bp mismatch compared to a common variant within an amplicon or a PCR  
508 chimera from two common parental variants within an amplicon). The weakness of this genotyping  
509 pipeline is that it relies on a single threshold below which all variants are considered artefacts,  
510 potentially making it particularly vulnerable to allele dropout (Sommer, Courtiol, & Mazzoni,  
511 2013). A second method was suggested by Sommer, Courtiol, & Mazzoni (2013), which relied on  
512 comparisons between duplicated amplicons and a series of decision making trees to discriminate

513 between allelic variants and artefacts. While the pipeline of Sommer, Courtiol, & Mazzoni (2013)  
514 also assumes that artefacts are less frequent than most allelic variants, it does not rely on a single  
515 threshold below which all sequences are considered artefacts. However, one potential weakness of  
516 this method is that it may be more vulnerable to repeatable artefacts and thus to false positives,  
517 particularly in systems highly diverse in terms of high copy number variation (CNV>10;  
518 Biedzzycka et al. 2017).

519 A further disadvantage of all the above early genotyping pipelines is that much of the  
520 sequencing depth data is wasted by simply discarding low threshold sequences. In order to  
521 maximise the available sequencing depth, recent genotyping methods have clustered artefactual  
522 (non-chimeric) sequences to their suspected parental variant to increase genotyping confidence.  
523 This trend has been particularly strong in the 16S rRNA microbiome community, which have  
524 traditionally clustered sequence variants to so called operational taxonomic units (OTUs) using a  
525 fixed similarity threshold (usually 97% similarity). More recent 16S rRNA clustering methods such  
526 as the entropy based Oligotyping tool used within ACACIA (Eren et al., 2013), as well as model  
527 based methods such as DADA2 (Callahan, McMurdie, & Holmes, 2016) and Deblur (Amir et al.,  
528 2017), have used alternative and more sophisticated statistical methods to simple similarity  
529 thresholds to distinguish sequence variants that differ by as little as one base pair. The clear benefit  
530 of clustering is that it significantly reduces the number of reads with low abundances, while  
531 increasing the read counts from poorly amplified allelic variants. However even the most  
532 sophisticated clustering methods will retain some artefacts within datasets (Amir et al., 2017;  
533 Callahan, McMurdie, & Holmes, 2017; Eren et al., 2013), hence the need for additional filtering  
534 steps following clustering. Downstream filtering strategies can also resemble the pre-clustering  
535 pipelines strategies mentioned above as was applied by Biedzzycka et al. (2017) using AmpliSAS in  
536 a highly complex system (19 to 42 allelic variants per amplicon). Biedzzycka et al. (2017) found a  
537 high agreement between genotyping methods as long as sequencing depth was sufficiently high.  
538 This will also likely be the case when applying ACACIA instead of AmpliSAS to such datasets.

539 An important benefit of the Oligotyping tool in ACACIA is that unlike other clustering  
540 methods which use the entire sequence, it only uses the base pairs with the most discriminant  
541 information based on entropy analyses (Eren et al., 2013). In the context of MHC genotyping in  
542 particular, such a strategy makes much intuitive sense, since most functional differences between  
543 MHC alleles will be within specific regions of the sequences which will contain the antigen-binding  
544 sites that are highly polymorphic as a result of strong positive selection.

545

#### 546 *The challenge of designing primers for non-model organisms*

547 A common approach for primer design in complex genomic regions of non-model organisms  
548 includes aligning multiple sequences of phylogenetically related species. By building primers on  
549 consensus sequences, researchers assume that oligos will amplify the target region also in the  
550 species of interest. However, knowledge about related species is often limited to very few  
551 individuals. This means that primers can be designed in regions that are polymorphic in the target  
552 species. As a consequence, certain allelic variants are not amplified and homozygosity is  
553 overestimated. Indeed, this proved to be the case in our naïve primers dataset, whereby two  
554 mismatches (1st bp and 16th bp) within the forward primer (19 bp long) were sufficient to prevent  
555 the amplification of three alleles (out of 13). Interestingly, a single base pair mismatch between the  
556 second base pair of the reverse primer and the BLB1\*04 allele did not prevent the amplification of  
557 this allele, although it did suffer severely from low amplification efficiency when in competition  
558 with other alleles (Figure 4). However, high sequencing depth for the naïve primer dataset  
559 prevented this allele from dropping out, regardless of the genotyping pipeline used. Our study  
560 therefore highlights the importance of designing multiple primers when wishing to genotype a novel  
561 target region in non-model organisms to limit allele dropout due to primer mismatch.

562

#### 563 *Relationship between number of alleles amplified and artefacts*



564 By knowing the exact alleles to expect for the chicken genotypes, we were able to quantify chimeric  
565 artefacts precisely (Figure 1). There was a higher proportion of chimeric and non-chimeric artefacts  
566 in the optimal primer dataset than in the naïve primer dataset. The most likely explanation for the  
567 latter is the shorter sequence for the naïve primer dataset (151 bp) compared to the optimal primer  
568 dataset (241 bp). A shorter fragment reduces the number of base pairs that can be erroneously  
569 substituted and the number of breaking points for chimera formation. In addition, it is likely that the  
570 probability of incomplete elongation is inversely related to fragment length. Thus, fragment length  
571 appears to be the dominant factor predicting the proportion of artefactual reads.

572 As expected, the proportion of reads that were non-chimeric artefacts increased linearly as  
573 CNV increased, which can be explained simply by the fact that there is an increasing number of  
574 possible artefacts that can be generated as the number of initial template variants increases. Thus,  
575 reads that failed to be completely elongated within the PCR cycles are more likely to be erroneously  
576 elongated during the final extension step.

577 A more unexpected result was that the proportions of chimeras did not increase with  
578 increasing CNV, when amplifying more than 4-6 alleles. Similarly, when amplifying more than 10  
579 alleles, the number of chimeric variants no longer increased with increasing CNV. Such saturation  
580 in chimera generation beyond a CNV threshold is likely to be a by-product of allele PCR  
581 competition. Indeed, as demonstrated by our own data (Figure 4), there is amplification bias  
582 whereby some gene variants are amplified preferentially relative to others (Marmesat et al., 2016;  
583 Sommer, Courtiol, & Mazzoni, 2013). Therefore, a few gene variants (~ 3-6 gene variants) are  
584 preferentially amplified and most chimeras originate from these dominantly amplified variants and  
585 few chimeras are generated from the poorly amplified variants. Indeed, we found that the number of  
586 parental variants generating chimeras in our dataset did not increase with increasing CNV when  
587 amplifying more than 4-6 alleles. The non-linear relationship between chimera generation and CNV  
588 have important implications when considering sequencing depth needed to accurately genotype  
589 complex multigene system, since it suggests that linearly increasing sequencing depth for increasing

590 CNV is not necessarily the optimal strategy. The challenges of dealing with chimeras in genotyping  
591 pipelines is discussed below in detail.

592

### 593 *Chimeras in genotyping pipelines*

594 The formation of artificial chimeras during amplification is an important source of artefacts in  
595 amplicon sequencing projects (Lenz & Becker, 2008; Smyth et al., 2010), including those with  
596 newer sequencing technologies (Laver et al., 2016). Chimeras are challenging to identify as  
597 artefacts because they resemble real alleles generated by recombination, particularly in multigene  
598 systems under high rates of interlocus genetic exchange (“concerted evolution”), which is common  
599 in many MHC systems (Reto et al., 2008; Reto et al., 2010; Edwards, Grahn, & Potts, 1995;  
600 Gillingham et al., 2016; Hess & Edwards, 2002; Wittzell et al., 1999). Our results suggest that  
601 chimeras are more prevalent, harder to identify and potentially more reproducible across technical  
602 replicates than previously assumed. We expect the same to be true for similar projects with  
603 conserved, yet variable amplification targets such as the MHC.

604 For the optimal primer dataset, regardless of the genotyping pipeline used, allele dropout  
605 occurred in genotypes with high CNV (for ACACIA 8 out of 9 and for AmpliSAS 12 out of 14  
606 haplotypes had a CNV < 10). For all instances bar one, allele dropout were alleles from the B21  
607 haplotype which amplified poorly when CNV was greater than 6 (Figure 2f). Higher sequencing  
608 depth will reduce or even remove such allele dropout instances (Biedrzycka et al., 2017). Indeed for  
609 the naïve primer dataset, sequencing depth was twice as high, and there were no instances of allele  
610 dropout due to the ACACIA pipeline (all allele dropouts were due to primer mismatch). One allele  
611 erroneously called as a real variant (i.e. a false positive) by the AmpliSAS pipeline in the optimal  
612 primer dataset was actually a chimera between the BLB1\*21 and BLB2\*21 alleles. Furthermore,  
613 when using the AmpliSAS pipeline, 15 allele dropouts in the naïve primer dataset were due to  
614 erroneous assignment of real allelic variants as chimera artefacts. Indeed, the BLB2\*12 or \*19  
615 minor allele was identical to potential chimeric artefact sequences between BLB1\*14 (85 possible

616 breakpoints) and any of the following alleles: BLB2\*04, BLB1\*15, BLB1\*19, BLB1\*21 or  
617 BLB2\*21 (Figure 5a.). In addition, BLB1\*14 dropped out because it is identical to a chimera  
618 formed between the BLB2\*02 minor and BLB2\*12 or \*19 alleles (33 breakpoints; Figure 5b.).

619 We have identified two factors which seemed to enhance chimera formation and challenge  
620 the distinction between artefact and real allelic variants. First, the combination of multiple real  
621 “parent” sequences can yield the same chimeras, as illustrated in our examples in Figure 5a. and  
622 Figure 5b., whereby any breakpoint in the shaded areas leads to the same chimeras. Second,  
623 peripheral breakpoints (Figure 5c.) can generate chimeras that differ to parental sequences by as  
624 little as a single base pair. For instance, a chimera could be a product of the allele BLB1\*21  
625 combined with any of the other alleles shown in the alignment, with a breakpoint within the shaded  
626 area (Figure 5c.). Since the potential breaking points are at the very end of the sequence, the  
627 chimera is very similar to one of its parents (in this example, it is different from BLB1\*21 by only  
628 one base). In an attempt to deal with this issue as much as possible, we changed the default settings  
629 of VSEARCH so that chimeras can be detected even if they differ from one parent by one single  
630 base. Both the “multiple parents” and the “peripheral breakpoints” issues are likely to contribute to  
631 making chimeras reproducible across replicates.

632

### 633 **Conclusion**

634 Genotyping accuracy and artefacts are intrinsically linked. We have demonstrated that the ACACIA  
635 genotyping pipeline provides high allele calling accuracy and repeatability. Regardless of the  
636 pipeline used, however, users should critically assess the optimal parameters to be used. We are  
637 convinced that universal default settings for optimal genotyping accuracy cannot be achieved, since  
638 optimal parameters will depend on dataset-specific generation of artefacts. The latter, in turn, varies  
639 according to species-specific CNV, DNA quality, and the conditions of PCR (e.g. extension time,  
640 number of cycles and the polymerase used) and sequencing (e.g. quality and depth). High  
641 sequencing depth allows detecting alleles that amplify poorly in complex (multigene) systems.

642 Furthermore simple steps prior to sequencing can greatly reduce the number of artefacts generated  
643 and improve genotyping accuracy: designing more than one PCR primer pair, reducing the number  
644 of PCR cycles, increasing PCR in-cycle extension time, and omitting the final extension step.  
645 Reducing chimera formation during PCRs is particularly critical, because they are difficult to  
646 distinguish from real alleles generated by inter-locus recombination.

647

#### 648 **Author contributions**

649 MG and PS conceived the study. PS wrote ACACIA. MG did the data analysis in R. MG, PS and  
650 KM ran the allele calling workflows. KM did the AmpliSAS analysis. KW participated in and  
651 supervised the lab work. KG did the lab work. SS instigated the study and heads the lab where the  
652 work was carried out. MG and PS wrote the first draft of the paper and all authors contributed to the  
653 writing in subsequent versions.

654

#### 655 **Data accessibility**

656 Raw sequences of all datasets, example input files, suggested settings and the source code at the  
657 time of this publication are available at FigShare (<https://figshare.com/projects/ACACIA/66485> and  
658 [doi.org/10.6084/m9.figshare.9952520](https://doi.org/10.6084/m9.figshare.9952520)). ACACIA is freely available on the GitLab at  
659 [https://gitlab.com/psc\\_santos/ACACIA](https://gitlab.com/psc_santos/ACACIA) (this paper's code is available as a snapshot tagged as V1.0,  
660 [https://gitlab.com/psc\\_santos/ACACIA/-/tags/V1.0](https://gitlab.com/psc_santos/ACACIA/-/tags/V1.0)), under an MIT license.

661

#### 662 **Acknowledgments**

663 MG was supported by a DFG grant (DFG Gi 1065/2-1). We are very grateful to Jim Kaufman and  
664 his lab members for providing the chicken DNA samples used in this study and for his comments  
665 on a previous version of this work.

666 **References**

- 667 Altschul, S. F., Gish, W., Miller, W., Myers, E. W., & Lipman, D. J. (1990). Basic local alignment  
668 search tool. *Journal of Molecular Biology*, 215(3), 403–410. doi: 10.1016/S0022-  
669 2836(05)80360-2
- 670 Amir, A., McDonald, D., Navas-Molina, J. A., Kopylova, E., Morton, J. T., Xu, Z. Z., ... Knight, R.  
671 (2017). Deblur Rapidly Resolves Single-Nucleotide Community Sequence Patterns.  
672 *MSystems*, 2(2), e00191-16. doi: 10.1128/mSystems.00191-16
- 673 Averdam, A., Petersen, B., Rosner, C., Neff, J., Roos, C., Eberle, M., ... Walter, L. (2009). A Novel  
674 System of Polymorphic and Diverse NK Cell Receptors in Primates. *PLOS Genetics*, 5(10),  
675 e1000688. doi: 10.1371/journal.pgen.1000688
- 676 Babik, W. (2010). Methods for MHC genotyping in non-model vertebrates. *Molecular Ecology*  
677 *Resources*, 10(2), 237–251. doi: 10.1111/j.1755-0998.2009.02788.x
- 678 Biedrzycka, A., Sebastian, A., Migalska, M., Westerdahl, H., & Radwan, J. (2017). Testing  
679 genotyping strategies for ultra-deep sequencing of a co-amplifying gene family: MHC class  
680 I in a passerine bird. *Molecular Ecology Resources*, 17(4), 642–655. doi: 10.1111/1755-  
681 0998.12612
- 682 Burri, R., Promerová, M., Goebel, J., & Fumagalli, L. (2014). PCR-based isolation of multigene  
683 families: lessons from the avian MHC class IIB. *Molecular Ecology Resources*, 14(4), 778–  
684 788. doi: 10.1111/1755-0998.12234
- 685 Burri, Reto, Hirzel, H. N., Salamin, N., Roulin, A., & Fumagalli, L. (2008). Evolutionary patterns of  
686 MHC class II B in owls and their implications for the understanding of avian MHC evolution.  
687 *Molecular Biology and Evolution*, 25(6), 1180–91. doi: 10.1093/molbev/msn065
- 688 Burri, Reto, Salamin, N., Studer, R. A., Roulin, A., & Fumagalli, L. (2010). Adaptive Divergence of  
689 Ancient Gene Duplicates in the Avian MHC Class II  $\beta$ . *Molecular Biology and Evolution*,  
690 27(10), 2360–2374. doi: 10.1093/molbev/msq120
- 691 Callahan, B. J., McMurdie, P. J., Rosen, M. J., Han, A. W., Johnson, A. J. A., & Holmes, S. P.  
692 (2016). DADA2: High-resolution sample inference from Illumina amplicon data. *Nature*  
693 *Methods*, 13(7), 581–583. doi: 10.1038/nmeth.3869

694 Chen, J.-M., Cooper, D. N., Chuzhanova, N., Férec, C., & Patrinos, G. P. (2007). Gene conversion:  
695 mechanisms, evolution and human disease. *Nature Reviews Genetics*, 8(10), 762–775. doi:  
696 10.1038/nrg2193

697 Cock, P. J. A., Antao, T., Chang, J. T., Chapman, B. A., Cox, C. J., Dalke, A., ... de Hoon, M. J. L.  
698 (2009). Biopython: freely available Python tools for computational molecular biology and  
699 bioinformatics. *Bioinformatics*, 25(11), 1422–1423. doi: 10.1093/bioinformatics/btp163

700 Edwards, S., Grahn, M., & Potts, W. (1995). Dynamics of Mhc evolution in birds and crocodilians:  
701 amplification of class II genes with degenerate primers. *Molecular Ecology*, 4, 719–729.

702 Eren, A. M., Maignien, L., Sul, W. J., Murphy, L. G., Grim, S. L., Morrison, H. G., & Sogin, M. L.  
703 (2013). Oligotyping: differentiating between closely related microbial taxa using 16S rRNA  
704 gene data. *Methods in Ecology and Evolution*, 4(12), 1111–1119. doi: 10.1111/2041-  
705 210X.12114

706 Flügge, P., Zimmermann, E., Hughes, A. L., Günther, E., & Walter, L. (2002). Characterization and  
707 Phylogenetic Relationship of Prosimian MHC Class I Genes. *Journal of Molecular*  
708 *Evolution*, 55(6), 768–775. doi: 10.1007/s00239-002-2372-7

709 Galan, M., Guivier, E., Caraux, G., Charbonnel, N., & Cosson, J.-F. (2010). A 454 multiplex  
710 sequencing method for rapid and reliable genotyping of highly polymorphic genes in large-  
711 scale studies. *BMC Genomics*, 11(1), 296. doi: 10.1186/1471-2164-11-296

712 Gillingham, M. a. F., Courtiol, A., Teixeira, M., Galan, M., Bechet, A., & Cezilly, F. (2016). Evidence  
713 of gene orthology and trans-species polymorphism, but not of parallel evolution, despite  
714 high levels of concerted evolution in the major histocompatibility complex of flamingo  
715 species. *Journal of Evolutionary Biology*, 29(2), 438–454. doi: 10.1111/jeb.12798

716 Glenn, T. C. (2011). Field guide to next-generation DNA sequencers. *Molecular Ecology*  
717 *Resources*, 11(5), 759–769. doi: 10.1111/j.1755-0998.2011.03024.x

718 Goto, R. M., Afanassieff, M., Ha, J., Iglesias, G. M., Ewald, S. J., Briles, W. E., & Miller, M. M.  
719 (2002). Single-strand conformation polymorphism (SSCP) assays for major  
720 histocompatibility complex B genotyping in chickens. *Poultry Science*, 81(12), 1832–1841.  
721 doi: 10.1093/ps/81.12.1832

722 Hess, C., & Edwards, S. (2002). The evolution of the major histocompatibility complex in birds.  
723 *Bioscience*, 52(5), 423–431.

724 Huse, S. M., Huber, J. A., Morrison, H. G., Sogin, M. L., & Welch, D. M. (2007). Accuracy and  
725 quality of massively parallel DNA pyrosequencing. *Genome Biology*, 8(7), R143. doi:  
726 10.1186/gb-2007-8-7-r143

727 Jacob, J. P., Milne, S., Beck, S., & Kaufman, J. (2000). The major and a minor class II  $\beta$ -chain (B-  
728 LB ) gene flank the Tapasin gene in the B-F /B-L region of the chicken major  
729 histocompatibility complex. *Immunogenetics*, 51(2), 138–147. doi: 10.1007/s002510050022

730 Judo, M. S. B., Wedel, A. B., & Wilson, C. (1998). Stimulation and suppression of PCR-mediated  
731 recombination. *Nucleic Acids Research*, 26(7), 1819–1825. doi: 10.1093/nar/26.7.1819

732 Katoh, K., & Standley, D. M. (2013). MAFFT Multiple Sequence Alignment Software Version 7:  
733 Improvements in Performance and Usability. *Molecular Biology and Evolution*, 30(4), 772–  
734 780. doi: 10.1093/molbev/mst010

735 Kaufman, J, Jacob, J., Shaw, I., Walker, B., Milne, S., Beck, S., & Salomonsen, J. (1999). Gene  
736 organisation determines evolution of function in the chicken MHC. *Immunological Reviews*,  
737 167, 101–17.

738 Kaufman, J, Milne, S., Göbel, T. W., Walker, B. a, Jacob, J. P., Auffray, C., ... Beck, S. (1999). The  
739 chicken B locus is a minimal essential major histocompatibility complex. *Nature*, 401(6756),  
740 923–5. doi: 10.1038/44856

741 Kaufman, Jim, Völk, H., & Wallny, H.-J. (1995). A “Minimal Essential Mhc” and an “Unrecognized  
742 Mhc”: Two Extremes in Selection for Polymorphism. *Immunological Reviews*, 143(1), 63–  
743 88. doi: 10.1111/j.1600-065X.1995.tb00670.x

744 Kelley, J., Walter, L., & Trowsdale, J. (2005). Comparative genomics of major histocompatibility  
745 complexes. *Immunogenetics*, 56(10), 683–695. doi: 10.1007/s00251-004-0717-7

746 Laver, T. W., Caswell, R. C., Moore, K. A., Poschmann, J., Johnson, M. B., Owens, M. M., ...  
747 Weedon, M. N. (2016). Pitfalls of haplotype phasing from amplicon-based long-read  
748 sequencing. *Scientific Reports*, 6, 21746. doi: 10.1038/srep21746

749 Lenz, T. L., & Becker, S. (2008). Simple approach to reduce PCR artefact formation leads to  
750 reliable genotyping of MHC and other highly polymorphic loci — Implications for  
751 evolutionary analysis. *Gene*, 427(1), 117–123. doi: 10.1016/j.gene.2008.09.013

752 Lighten, J., Oosterhout, C., Paterson, I. G., McMullan, M., & Bentzen, P. (2014). Ultra-deep  
753 Illumina sequencing accurately identifies MHC class IIb alleles and provides evidence for  
754 copy number variation in the guppy (*Poecilia reticulata*). *Molecular Ecology Resources*,  
755 14(4), 753–767. doi: 10.1111/1755-0998.12225

756 Lighten, J., Oosterhout, C. van, & Bentzen, P. (2014). Critical review of NGS analyses for de novo  
757 genotyping multigene families. *Molecular Ecology*, 23(16), 3957–3972. doi:  
758 10.1111/mec.12843

759 Liu, Y., Keller, I., & Heckel, G. (2012). Breeding site fidelity and winter admixture in a long-distance  
760 migrant, the tufted duck (*Aythya fuligula*). *Heredity*, 109(2), 108–116. doi:  
761 10.1038/hdy.2012.19

762 Magoč, T., & Salzberg, S. L. (2011). FLASH: Fast Length Adjustment of Short Reads to Improve  
763 Genome Assemblies. *Bioinformatics*, btr507. doi: 10.1093/bioinformatics/btr507

764 Marmesat, E., Soriano, L., Mazzoni, C. J., Sommer, S., & Godoy, J. A. (2016). PCR Strategies for  
765 Complete Allele Calling in Multigene Families Using High-Throughput Sequencing  
766 Approaches. *PLOS ONE*, 11(6), e0157402. doi: 10.1371/journal.pone.0157402

767 McElroy, K. E., Luciani, F., & Thomas, T. (2012). GemSIM: general, error-model based simulator of  
768 next-generation sequencing data. *BMC Genomics*, 13(1), 74. doi: 10.1186/1471-2164-13-  
769 74

770 McKinney, W. (2010). Data structures for statistical computing in Python. *Proceedings of the 9th*  
771 *Python in Science Conference*, 51–56.

772 Megléc, E., Piry, S., Desmarais, E., Galan, M., Gilles, A., Guivier, E., ... Martin, J.-F. (2011).  
773 SESAME (SEquence Sorter & AMplicon Explorer): genotyping based on high-throughput  
774 multiplex amplicon sequencing. *Bioinformatics (Oxford, England)*, 27(2), 277–8. doi:  
775 10.1093/bioinformatics/btq641



776 Miller, S. A., Dykes, D. D., & Polesky, H. F. (1988). A simple salting out procedure for extracting  
777 DNA from human nucleated cells. *Nucleic Acids Research*, *16*(3), 1215.

778 Nakamura, T., Yamada, K. D., Tomii, K., & Katoh, K. (2018). Parallelization of MAFFT for large-  
779 scale multiple sequence alignments. *Bioinformatics*, *34*(14), 2490–2492. doi:  
780 10.1093/bioinformatics/bty121

781 Nei, M., Gu, X., & Sitnikova, T. (1997). Evolution by the birth-and-death process in multigene  
782 families of the vertebrate immune system. *Proceedings of the National Academy of*  
783 *Sciences*, *94*(15), 7799–7806.

784 Nei, M., & Rooney, A. P. (2005). Concerted and Birth-and-Death Evolution of Multigene Families.  
785 *Annual Review of Genetics*, *39*, 121–152. doi: 10.1146/annurev.genet.39.073003.112240

786 Parham, P., & Ohta, T. (1996). Population Biology of Antigen Presentation by MHC Class I  
787 Molecules. *Science*, *272*(5258), 67–74. doi: 10.1126/science.272.5258.67

788 Pavey, S. A., Sevellec, M., Adam, W., Normandeau, E., Lamaze, F. C., Gagnaire, P.-A., ...  
789 Bernatchez, L. (2013). Nonparallelism in MHCII $\beta$  diversity accompanies nonparallelism in  
790 pathogen infection of lake whitefish (*Coregonus clupeaformis*) species pairs as revealed by  
791 next-generation sequencing. *Molecular Ecology*, *22*(14), 3833–3849. doi:  
792 10.1111/mec.12358

793 Promerová, M., Babik, W., Bryja, J., Albrecht, T., Stuglik, M., & Radwan, J. (2012). Evaluation of  
794 two approaches to genotyping major histocompatibility complex class I in a passerine—CE-  
795 SSCP and 454 pyrosequencing. *Molecular Ecology Resources*, *12*(2), 285–292. doi:  
796 10.1111/j.1755-0998.2011.03082.x

797 Quail, M. A., Smith, M., Coupland, P., Otto, T. D., Harris, S. R., Connor, T. R., ... Gu, Y. (2012). A  
798 tale of three next generation sequencing platforms: comparison of Ion Torrent, Pacific  
799 Biosciences and Illumina MiSeq sequencers. *BMC Genomics*, *13*(1), 341. doi:  
800 10.1186/1471-2164-13-341

801 R Core Team. (2018). *R: A Language and Environment for Statistical Computing*. Retrieved from  
802 <https://www.R-project.org/>

803 Radwan, J., Zagalska-Neubauer, M., Cichoń, M., Sendacka, J., Kulma, K., Gustafsson, L., &  
804 Babik, W. (2012). MHC diversity, malaria and lifetime reproductive success in collared

805 flycatchers. *Molecular Ecology*, 21(10), 2469–2479. doi: 10.1111/j.1365-  
806 294X.2012.05547.x

807 Rognes, T., Flouri, T., Nichols, B., Quince, C., & Mahé, F. (2016). VSEARCH: a versatile open  
808 source tool for metagenomics. *PeerJ*, 4, e2584. doi: 10.7717/peerj.2584

809 Ross, M. G., Russ, C., Costello, M., Hollinger, A., Lennon, N. J., Hegarty, R., ... Jaffe, D. B.  
810 (2013). Characterizing and measuring bias in sequence data. *Genome Biology*, 14(5), R51.  
811 doi: 10.1186/gb-2013-14-5-r51

812 Rozen, S., & Skaletsky, H. (1999). Primer3 on the WWW for General Users and for Biologist  
813 Programmers. In S. Misener & S. A. Krawetz (Eds.), *Bioinformatics Methods and Protocols*  
814 (pp. 365–386). doi: 10.1385/1-59259-192-2:365

815 Sebastian, A., Herdegen, M., Migalska, M., & Radwan, J. (2016). AmpliSAS: a web server for  
816 multilocus genotyping using next-generation amplicon sequencing data. *Molecular Ecology*  
817 *Resources*, 16(2), 498–510. doi: 10.1111/1755-0998.12453

818 Sepil, I., Moghadam, H. K., Huchard, E., & Sheldon, B. C. (2012). Characterization and 454  
819 pyrosequencing of Major Histocompatibility Complex class I genes in the great tit reveal  
820 complexity in a passerine system. *BMC Evolutionary Biology*, 12(1), 68. doi: 10.1186/1471-  
821 2148-12-68

822 Shaw, I., Powell, T. J., Marston, D. A., Baker, K., van Hateren, A., Riegert, P., ... Kaufman, J.  
823 (2007). Different evolutionary histories of the two classical class I genes BF1 and BF2  
824 illustrate drift and selection within the stable MHC haplotypes of chickens. *The Journal of*  
825 *Immunology*, 178(9), 5744–5752.

826 Smyth, R. P., Schlub, T. E., Grimm, A., Venturi, V., Chopra, A., Mallal, S., ... Mak, J. (2010).  
827 Reducing chimera formation during PCR amplification to ensure accurate genotyping.  
828 *Gene*, 469(1), 45–51. doi: 10.1016/j.gene.2010.08.009

829 Sommer, S., Courtiol, A., & Mazzoni, C. J. (2013). MHC genotyping of non-model organisms using  
830 next-generation sequencing: a new methodology to deal with artefacts and allelic dropout.  
831 *BMC Genomics*, 14(1), 542. doi: 10.1186/1471-2164-14-542

832 Stuglik, M. T., Radwan, J., & Babik, W. (2011). jMHC: software assistant for multilocus genotyping  
833 of gene families using next-generation amplicon sequencing. *Molecular Ecology Resources*,  
834 *11*(4), 739–42. doi: 10.1111/j.1755-0998.2011.02997.x

835 Stutz, W. E., & Bolnick, D. I. (2014). Stepwise Threshold Clustering: A New Method for Genotyping  
836 MHC Loci Using Next-Generation Sequencing Technology. *PLOS ONE*, *9*(7), e100587. doi:  
837 10.1371/journal.pone.0100587

838 Untergasser, A., Cutcutache, I., Koressaar, T., Ye, J., Faircloth, B. C., Remm, M., & Rozen, S. G.  
839 (2012). Primer3—new capabilities and interfaces. *Nucleic Acids Research*, *40*(15), e115–  
840 e115. doi: 10.1093/nar/gks596

841 Wallny, H.-J., Avila, D., Hunt, L. G., Powell, T. J., Riegert, P., Salomonsen, J., ... Kaufman, J.  
842 (2006). Peptide motifs of the single dominantly expressed class I molecule explain the  
843 striking MHC-determined response to Rous sarcoma virus in chickens. *Proceedings of the*  
844 *National Academy of Sciences of the United States of America*, *103*(5), 1434–1439. doi:  
845 10.1073/pnas.0507386103

846 Wickham, H. (2016). *ggplot2: Elegant Graphics for Data Analysis*. Springer.

847 Wittzell, H., Bernot, A., Auffray, C., & Zoorob, R. (1999). Concerted evolution of two Mhc class II B  
848 loci in pheasants and domestic chickens. *Molecular Biology and Evolution*, *16*(4), 479–490.

849  
850

851 **Figure 1:** Flow diagram of reads and sequences from two Illumina runs analysed with ACACIA.  
852 Blue bars correspond to filters, and the percentages given correspond to the sequences kept at each  
853 step for further analyses. The percentage given at the bottom for artefacts refers to the total amount  
854 of reads in the beginning of the process. (Fwd & Rev) raw forward and reverse reads; (Mrg) Paired-  
855 end read merger; (Prm) primer filter; (QC) quality control; (Sgt) Singleton removal; (Chm) chimera  
856 removal; (Blt) BLAST filter.

857

858 **Figure 2:** Allele calling accuracy and repeatability for the two datasets of this study (optimal primer  
859 or n) at different *abs\_nor* threshold settings with *low\_por* set at 0 within the ACACIA pipeline (a.);

860 at different *low\_por* threshold settings with *abs\_nor* set at 100 within the ACACIA pipeline (c.);  
861 and, at different filtering thresholds (i.e. ‘minimum amplicon frequency’) within the AmpliSAS  
862 pipeline.

863

864 **Figure 3:** The relationship between the number of alleles amplified and: the proportion of non-  
865 chimeric reads (a.); the proportion of chimeric reads (b.); the absolute number of chimeric variants  
866 (c.); and, the absolute number of parental variants generating chimeric reads (d.). All relationships  
867 were fitted with general additive model using the ggplot package (Wickham, 2016) in R (R Core  
868 Team, 2018) using a binomial distribution for (a.), (b.) and (f.), and a Poisson distribution corrected  
869 for over-dispersion for (c.) and (d.).

870

871 **Figure 4:** The relationship between the number of alleles amplified and the proportion of reads for  
872 each real allelic variant. All relationships were fitted with general additive model using the ggplot  
873 package (Wickham, 2016) in R (R Core Team, 2018) using a binomial distribution.

874

875 **Figure 5:** Three alignments with examples of sequences which can be classified as chimeras. The  
876 points denote identity to the first sequence in each alignment, while the differences to it are  
877 highlighted. The shaded areas indicate possible chimera-yielding breakpoints. (a) The allele  
878 BLB2\*12 or \*19 could be a chimera of BLB1\*14 with any of the four other allele sequences  
879 depicted, in a case of multiple potential parent pairs. (b) BLB1\*14 can be interpreted as a chimera  
880 between BLB2\*12 or \*19 minor and BLB2\*02. (c) Actual chimera with multiple potential parents  
881 and a peripheral breakpoint, and therefore very similar to one of its parents.

882 **Table 1:** The number of alleles per genotype, the number of  
883 genotypes with a certain number alleles and the number of  
884 amplicons with a certain number alleles (all genotypes were  
885 duplicated) for the chicken datasets used in this study. The list  
886 haplotypes used to artificially create the genotypes are listed in  
887 supplementary Table S1.

| Number of alleles<br>per genotype | Number of genotypes | Number of amplicons |
|-----------------------------------|---------------------|---------------------|
| 2                                 | 7                   | 14                  |
| 4                                 | 7                   | 14                  |
| 6                                 | 7                   | 14                  |
| 8                                 | 7                   | 14                  |
| 10                                | 7                   | 14                  |
| 11                                | 5                   | 10                  |
| 12                                | 2                   | 4                   |
| 13                                | 1                   | 2                   |
| <b>Total</b>                      | <b>43</b>           | <b>86</b>           |

888

889 **Table 2:** Genotypes with allele dropouts and false positives using ACACIA and AmpliSAS  
890 (excluding allele dropout due to primer mismatch in the naïve primers dataset).

| Genotype                                             | Replicate | Number of predicted alleles | Allele dropout using ACACIA | Allele dropout using AmpliSAS | False positive using AmpliSAS |
|------------------------------------------------------|-----------|-----------------------------|-----------------------------|-------------------------------|-------------------------------|
| <b>a. Optimal primers dataset (BLB MHC Class II)</b> |           |                             |                             |                               |                               |
| B2-B4-B12-B14-B19-B21                                | 1         | 11                          | BLB1*21                     | BLB1*21<br>BLB2*21            |                               |
| B4-B14-B15-B19-B21                                   | 1         | 10                          | BLB1*21                     | BLB2*21                       |                               |
|                                                      | 2         | 10                          | BLB1*21                     | BLB1*21                       |                               |
| B4-B15-B19-B21                                       | 1         | 8                           | BLB1*21                     | BLB2*21                       |                               |
| B2-B4-B12-B14-B15-B19-B21                            | 1         | 13                          | BLB1*21<br>BLB2*21          | BLB1*21<br>BLB2*21            |                               |
| B2-B4-B12-B14-B15-B21                                | 1         | 12                          | BLB1*21<br>BLB2*21          | BLB1*21<br>BLB2*21            |                               |
| B2-B12-B14-B15-B19-B21                               | 1         | 11                          | BLB2*21                     |                               |                               |
| B2-B4-B12-B15-B19-B21                                | 1         | 11                          |                             | BLB2*21                       |                               |
| B2-B4-B12-B15-B21                                    | 1         | 10                          |                             | BLB2*21                       |                               |
| B2-B4-B14-B15-B19-B21                                | 1         | 12                          |                             | BLB2*21                       |                               |
| B2-B4-B14-B15-B21                                    | 1         | 10                          |                             | BLB2*21                       |                               |
| B2-B4-B15-B19-B21                                    | 1         | 10                          |                             | BLB2*21                       |                               |
|                                                      | 2         | 10                          |                             | BLB2*21                       |                               |
| B4-B12-B21                                           | 1         | 6                           |                             | BLB2*04                       | 1 false positive              |
| B4-B14-B15-B19-B21                                   | 2         | 10                          |                             | BLB2*21                       |                               |
| <b>b. Naïve primers dataset (BLB MHC Class II)</b>   |           |                             |                             |                               |                               |
| B12-B14-B15-B21                                      | 1         | 5                           |                             | BLB2*12 or *19                |                               |
|                                                      | 2         | 5                           |                             | BLB2*12 or *19                |                               |
| B14-B15-B19-B21                                      | 1         | 8                           |                             | BLB2*12 or *19                |                               |
| B2-B12-B14-B15                                       | 1         | 6                           |                             | BLB2*12 or *19                |                               |
|                                                      | 2         | 6                           |                             | BLB2*12 or *19                |                               |
| B2-B12-B14-B15-B19-B21                               | 1         | 11                          |                             | BLB1*14                       |                               |
| B2-B14-B15-B19-B21                                   | 1         | 10                          |                             | BLB2*12 or *19                |                               |
| B2-B4-B12-B14-B15                                    | 1         | 10                          |                             |                               |                               |
|                                                      | 2         | 10                          |                             | BLB2*12 or *19                |                               |
|                                                      |           |                             |                             | BLB2*12 or *19                |                               |
| B2-B4-B12-B14-B15-B19                                | 1         | 11                          |                             | BLB1*14                       |                               |
| B2-B4-B12-B14-B15-B19-B21                            | 1         | 13                          |                             | BLB1*14                       |                               |
| B2-B4-B12-B14-B15-B21                                | 1         | 12                          |                             | BLB2*12 or *19                |                               |
| B2-B4-B12-B14-B19-B21                                | 1         | 11                          |                             | BLB1*14                       |                               |
| B2-B4-B14-B15-B19-B21                                | 1         | 12                          |                             | BLB2*12 or *19                |                               |
| B4-B12-B14-B15                                       | 1         | 8                           |                             | BLB2*12 or *19                |                               |
|                                                      | 2         | 8                           |                             | BLB2*12 or *19                |                               |
| B4-B14-B15-B19-B21                                   | 1         | 10                          |                             | BLB2*12 or *19                |                               |

892 **Table S1:** The chicken MHC *B* complex haplotypes and combined  
 893 haplotypes which formed experimental genotypes with varying copy  
 894 number variation (CNV).

| Combined haplotypes       | Number of alleles |
|---------------------------|-------------------|
| B2                        | 2                 |
| B4                        | 2                 |
| B12                       | 2                 |
| B14                       | 2                 |
| B15                       | 2                 |
| B19                       | 2                 |
| B21                       | 2                 |
| B2-B4                     | 4                 |
| B2-B12                    | 4                 |
| B4-B12                    | 4                 |
| B12-B14                   | 4                 |
| B12-B21                   | 4                 |
| B14-B15                   | 4                 |
| B19-B21                   | 4                 |
| B2-B4-B19                 | 6                 |
| B2-B14-B19                | 6                 |
| B2-B15-B19                | 6                 |
| B4-B12-B21                | 6                 |
| B4-B14-B19                | 6                 |
| B12-B14-B21               | 6                 |
| B15-B19-B21               | 6                 |
| B2-B4-B12-B14             | 8                 |
| B2-B12-B14-B15            | 8                 |
| B2-B14-B19-B21            | 8                 |
| B4-B12-B14-B15            | 8                 |
| B4-B15-B19-B21            | 8                 |
| B12-B14-B15-B21           | 8                 |
| B14-B15-B19-B21           | 8                 |
| B2-B4-B12-B14-B15         | 10                |
| B2-B4-B12-B14-B21         | 10                |
| B2-B4-B12-B15-B21         | 10                |
| B2-B4-B14-B15-B21         | 10                |
| B2-B4-B15-B19-B21         | 10                |
| B2-B14-B15-B19-B21        | 10                |
| B4-B14-B15-B19-B21        | 10                |
| B2-B4-B12-B14-B15-B19     | 11                |
| B2-B4-B12-B14-B15-B21     | 12                |
| B2-B4-B12-B14-B19-B21     | 11                |
| B2-B4-B12-B15-B19-B21     | 11                |
| B2-B4-B14-B15-B19-B21     | 12                |
| B2-B12-B14-B15-B19-B21    | 11                |
| B4-B12-B14-B15-B19-B21    | 11                |
| B2-B4-B12-B14-B15-B19-B21 | 13                |

895

896

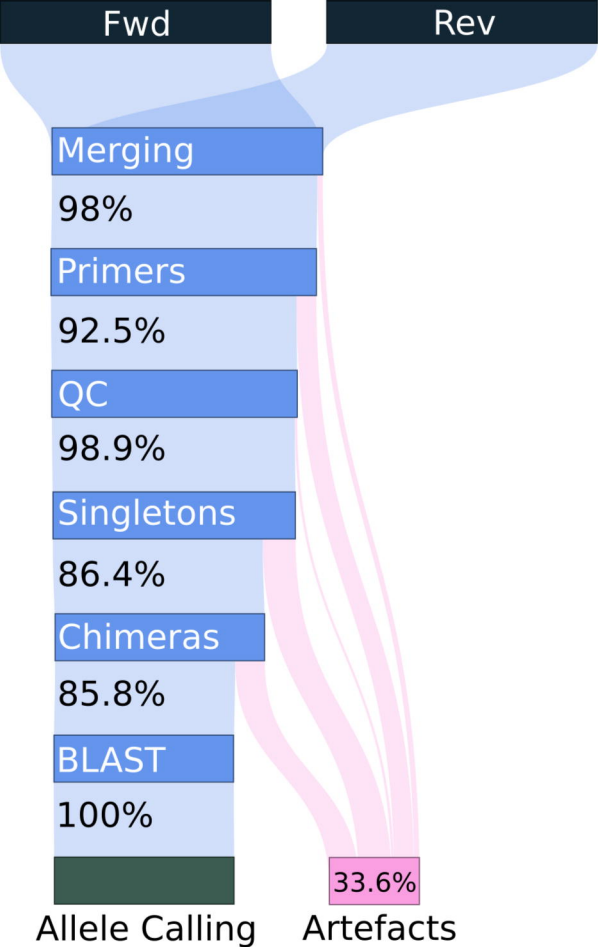



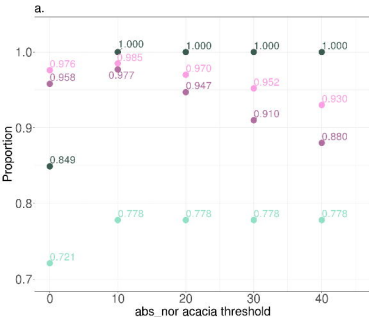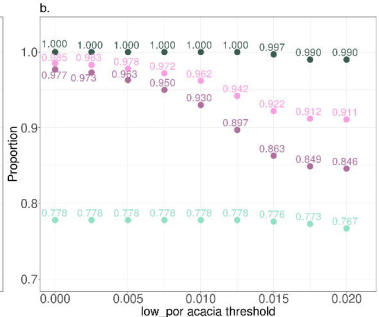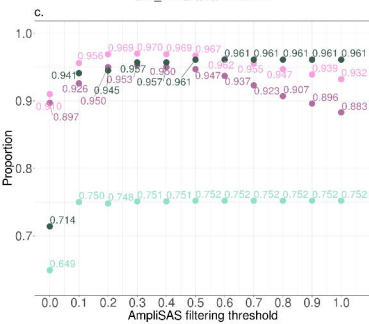

- Accuracy optimal primer dataset
- Repeatability optimal primer dataset
- Accuracy naïve primer dataset
- Repeatability naïve primer dataset

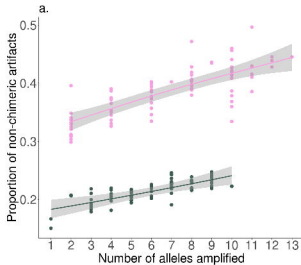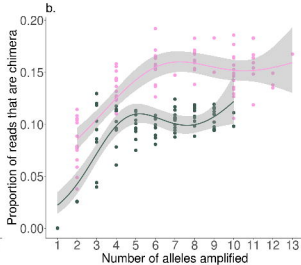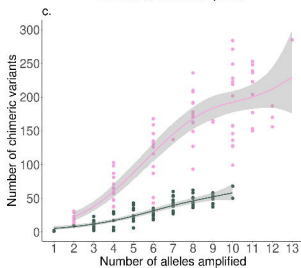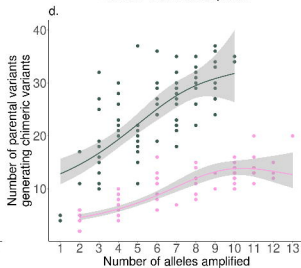

Primer set

- Optimal
- Naive

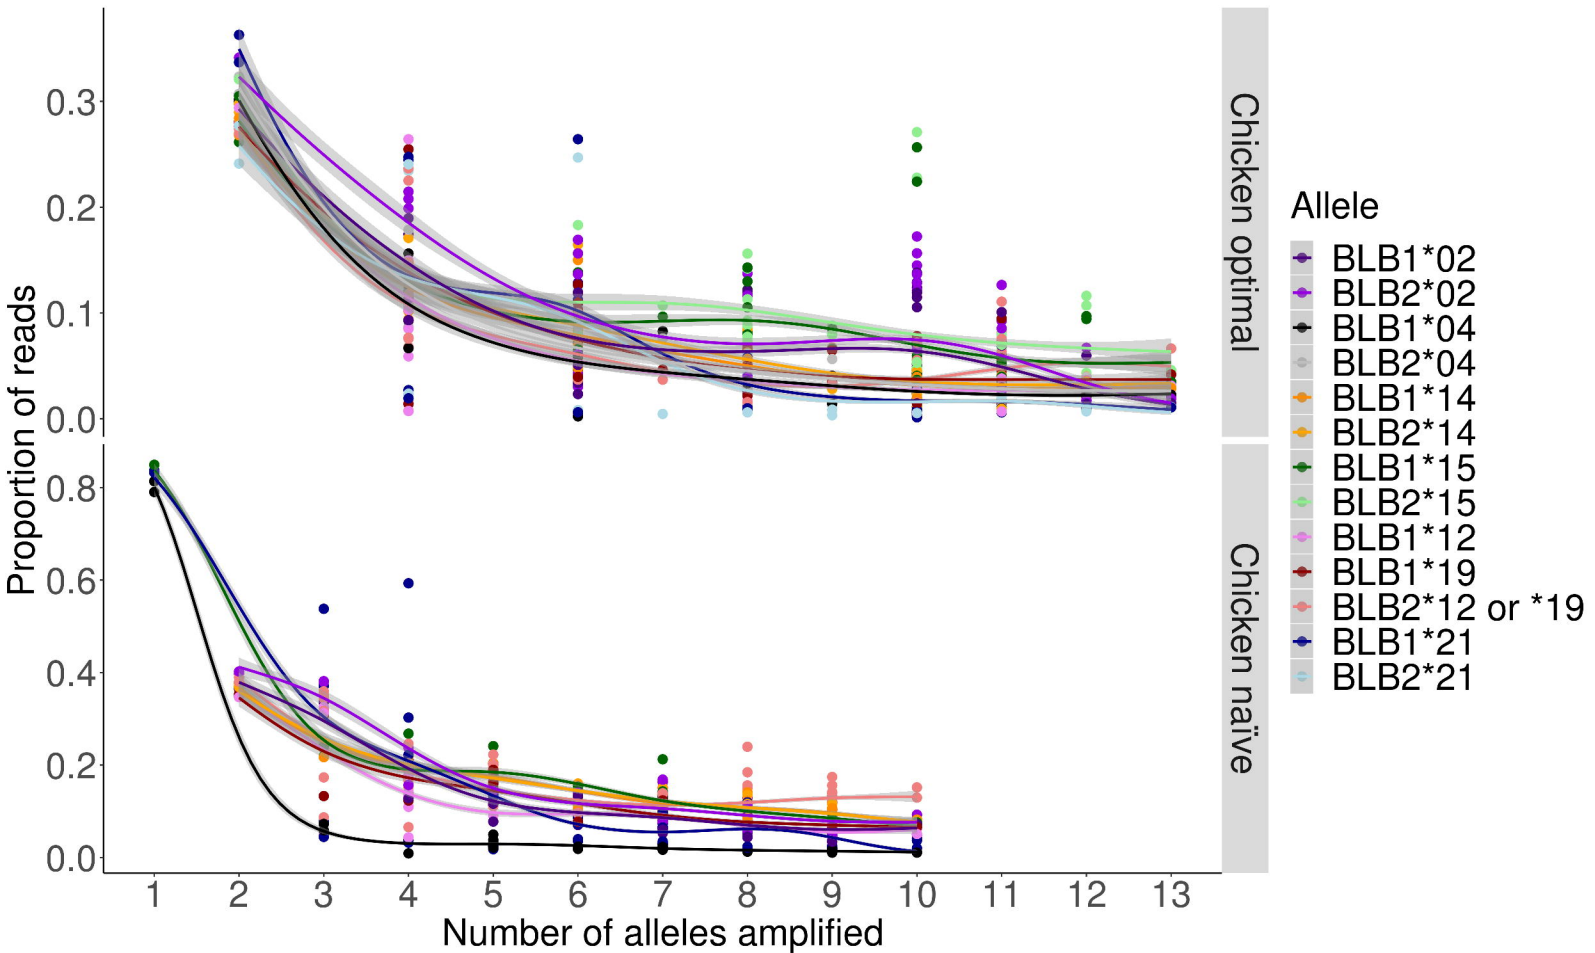

**a**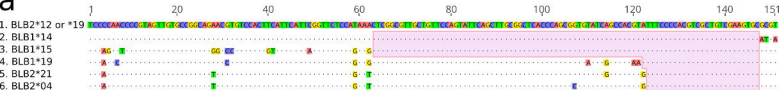**b**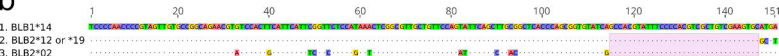**c**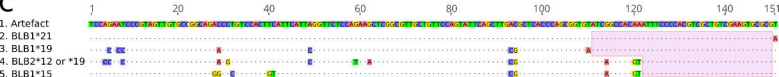

Source: https://www.biorxiv.org/content/10.1101/638288v2.full.pdf
